# Supplementary material for: Constructing energetic coordination polymers through mixed-ligand strategy: way to achieve reduced sensitivity with significant energetic performance
Source: Royal Society of Chemistry journal article supplement (doi:10.1039/d3ce01043k), 2023-12-21
Supplement: d3ce01043k1.pdf [file d3ce01043k1.pdf]

# Electronic Supplementary Information

## Constructing Energetic Coordination Polymers through Mixed-Ligand Strategy: Way to Achieve Reduced Sensitivity with Significant Energetic Performance

Priyanka Singla,<sup>a,b</sup> Pramod Kumar Soni,<sup>b</sup> Arjun Singh<sup>\*b</sup> and Subash Chandra Sahoo<sup>\*a</sup>

<sup>1</sup>Department of Chemistry, Panjab University, Chandigarh 160014, India. \*Email: subash.chem@gmail.com

<sup>2</sup>Terminal Ballistics Research Laboratory, DRDO, Chandigarh 160030, India. \*Email: arjun.sngl@yahoo.com

| Table of contents                                                                      | Page No. |
|----------------------------------------------------------------------------------------|----------|
| 1. Instrumental Details for Characterization.                                          | 1        |
| 2. <sup>1</sup> H NMR and <sup>13</sup> C NMR of atrz ligand.                          | 2-3      |
| 3. Crystal data and structural refinement of <b>1</b> and <b>2</b> .                   | 4        |
| 4. Selected bond lengths (Å) and angles (°) of <b>1</b> and <b>2</b> .                 | 5        |
| 5. ORTEP diagrams of <b>1</b> and <b>2</b> .                                           | 6        |
| 6. Hydrogen bond lengths (Å) and angles (°) in <b>1</b> and <b>2</b> .                 | 7        |
| 7. 2D Fingerplots for individual interactions in <b>1</b> and <b>2</b> .               | 7        |
| 8. PXRD patterns of <b>1</b> and <b>2</b> .                                            | 8        |
| 9. FT-IR spectrum of atrz, <b>1</b> and <b>2</b> .                                     | 9        |
| 10. UV spectrum of atrz, HDNBA, <b>1</b> and <b>2</b> .                                | 10       |
| 11. Thermal characteristic data of the <b>1</b> and <b>2</b> obtained from DSC method. | 10       |
| 12. Energetic parameters of <b>1</b> and <b>2</b> .                                    | 11       |
| 13. Activation energy data for <b>1</b> and <b>2</b> .                                 | 11       |

## Instrumental Details for Characterization

The Powder X-ray diffractometer (PXRD) patterns of the metal CPs were recorded through a X'PERT PRO X-ray diffractometer (PANalytical, Netherlands) employing Cu (wavelength = 1.54184 Å) as anode material and  $K\alpha$  (0.1 nm) ( $CuK\alpha$  radiation source) and generator setting at 40 kV and 50 mA. The XRD scanning range of 2 theta ( $2\theta$ ) was adjusted within 10 - 50 degree. FT-IR spectra were recorded in the spectral region of 4000-500  $cm^{-1}$  using a Fourier transform infrared spectroscopy as supplied by Nicolet Avatar 360 using KBr pellets. The samples were grounded with dried KBr powder before pressed into KBr pellets using a hydraulic press. Friction Sensitivity and Impact Sensitivity were tested by Bruceton staircase up down method using BAM Friction Apparatus FSKM-10 and OZM Research BAM Fall Hammer BFH-12 respectively. For friction sensitivity testing, 30-33 mg sample was evenly spread on the porcelain plate, and the frictional force was produced by dragging standard BAM weights across the sample. For impact sensitivity test, the sample was pressed between two steel caps while a standard weight was dropped from various heights. Impact sensitivity was expressed in terms of height from which standard weight dropped on a sample with 50% probability of explosion. Thermal study was carried out through TGA and DSC (Mettler Toledo International Inc., GmbH, Switzerland, model TGA/DSC 1). For thermal stability, the samples were ramped to 25-600 °C at heating rate of 10 °C  $min^{-1}$  under flow rate of nitrogen gas 40 mL  $min^{-1}$ . For each measurement, 4-6 mg of the sample was taken in an alumina crucible. For kinetic analysis, the samples were subjected to the thermal decomposition at three heating rates; 10, 20 and 30 °C  $min^{-1}$  under nitrogen atmosphere. The thermal characteristic data was interpreted by using STARe Software version 11.00 system. The combustion energy at constant volume was determined by using Parr 6200 oxygen bomb calorimeter. A pellet for mixture of CPs and benzoic acid in 1:3 ratio was pressed by hydraulic press. The oxygen bomb calorimeter was calibrated by using pellet of 1 gram of certified benzoic acid. (Standard reference material, 39i, NIST). UV-Vis spectra were recorded on JASCO V-530 UV-Vis spectrophotometer within the range of 200-900 nm using water as reference solvent with scan rate of 400 nm  $s^{-1}$ . SEM images were collected on Carlo Zeiss (SEM Evo 5 Model).  $^1H$  and  $^{13}C$  NMR spectra was recorded on Bruker 500 MHz advance – II spectrometer in DMSO solvent using TMS as internal reference. CHN elemental analysis was carried out on Thermo Scientific Flash 2000 organic elemental analyser.

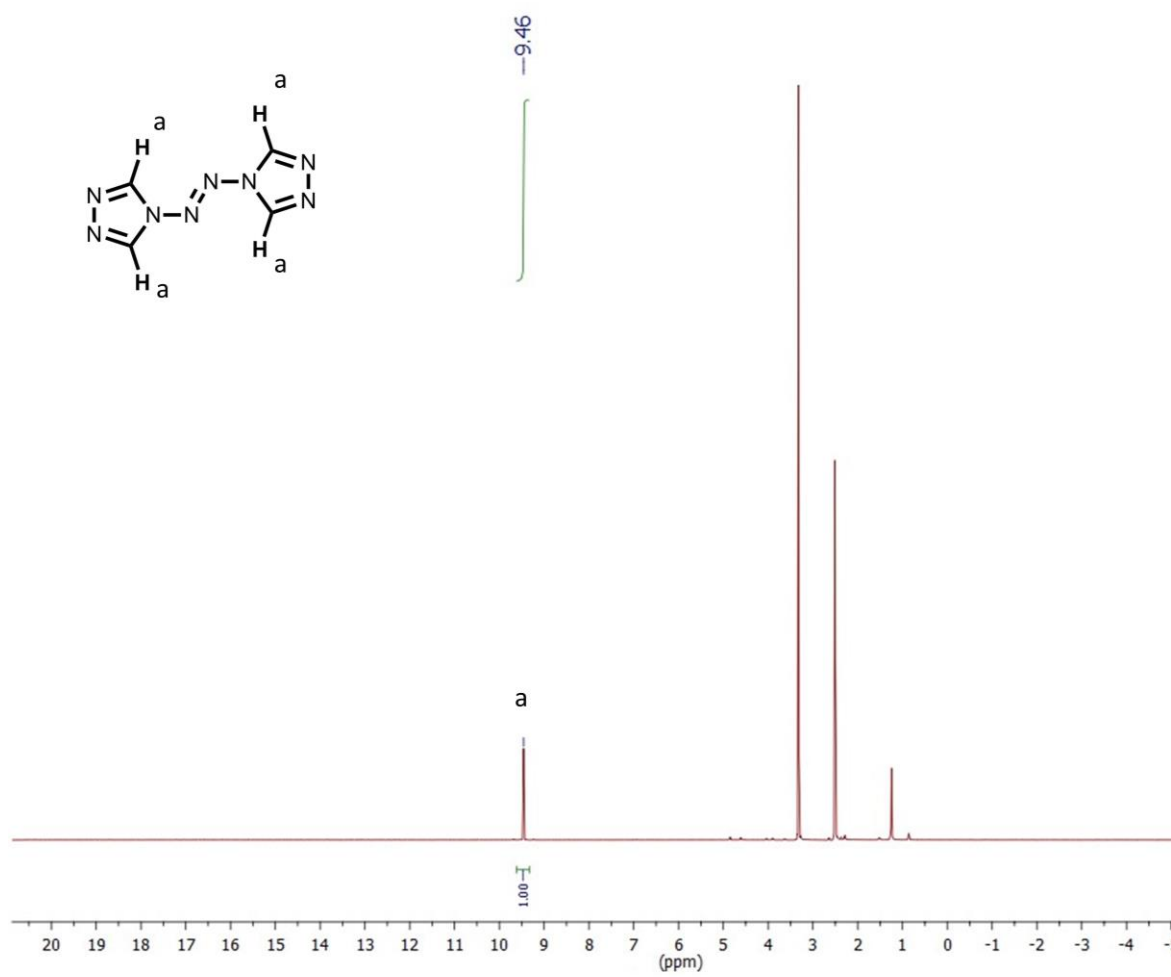

**Fig. S1** <sup>1</sup>H NMR of ligand atrz in DMSO-*d*<sub>6</sub> solvent.

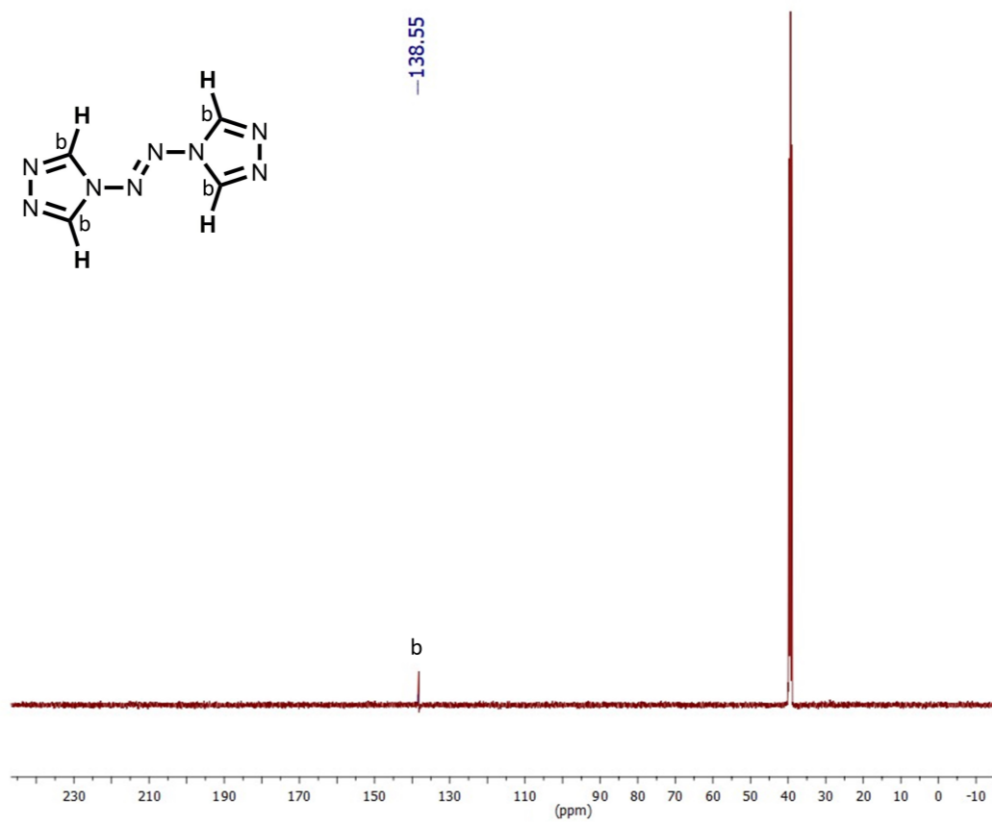

**Fig. S2** <sup>13</sup>C NMR of ligand atrz in DMSO-*d*<sub>6</sub> solvent.

**Table S1** Crystal data and structural refinement of **1** and **2**.

| Crystal parameter                                            | <b>1</b>                                                                      | <b>2</b>                                                                      |
|--------------------------------------------------------------|-------------------------------------------------------------------------------|-------------------------------------------------------------------------------|
| CCDC No                                                      | 2266710                                                                       | 2266709                                                                       |
| Empirical Formula                                            | C <sub>9</sub> H <sub>7</sub> N <sub>6</sub> O <sub>7</sub> Zn <sub>0.5</sub> | C <sub>9</sub> H <sub>7</sub> N <sub>6</sub> O <sub>7</sub> Cd <sub>0.5</sub> |
| Formula Weight                                               | 343.89                                                                        | 367.41                                                                        |
| T (K)                                                        | 293(2)                                                                        | 293(2)                                                                        |
| Wavelength (Å)                                               | Mo K $\alpha$ ( $\lambda$ = 0.71073)                                          | Mo K $\alpha$ ( $\lambda$ = 0.71073)                                          |
| Crystal system                                               | Monoclinic                                                                    | Monoclinic                                                                    |
| Space group                                                  | <i>P</i> 2 <sub>1</sub> / <i>n</i>                                            | <i>P</i> 2 <sub>1</sub> / <i>n</i>                                            |
| <i>a</i> , (Å)                                               | 10.59                                                                         | 10.78                                                                         |
| <i>b</i> , (Å)                                               | 5.32                                                                          | 5.43                                                                          |
| <i>c</i> , (Å)                                               | 22.33                                                                         | 22.49                                                                         |
| <i>V</i> , (Å <sup>3</sup> )                                 | 1259.22                                                                       | 1318.97                                                                       |
| <i>z</i> / <i>p</i>                                          | 4/1.814                                                                       | 4/1.850                                                                       |
| $\mu$ (mm <sup>-1</sup> )                                    | 1.075                                                                         | 0.923                                                                         |
| Collected reflections                                        | 16449                                                                         | 12582                                                                         |
| Independent reflections                                      | 2748                                                                          | 2771                                                                          |
| <i>F</i> (000)                                               | 696.0                                                                         | 732                                                                           |
| GOF                                                          | 1.054                                                                         | 0.901                                                                         |
| final <i>R</i> indices [ <i>I</i> > 2 $\sigma$ ( <i>I</i> )] | <i>R</i> <sub>1</sub> = 0.0342, <i>wR</i> <sub>2</sub> = 0.0902               | <i>R</i> <sub>1</sub> = 0.0351, <i>wR</i> <sub>2</sub> = 0.0767               |
| <i>R</i> indices (all data)                                  | <i>R</i> <sub>1</sub> = 0.0419, <i>wR</i> <sub>2</sub> = 0.0940               | <i>R</i> <sub>1</sub> = 0.0476, <i>wR</i> <sub>2</sub> = 0.0868               |

**Table S2** Selected bond lengths (Å) and bond angles (°) of **1** and **2**.

| Selected bond lengths (Å) in <b>1</b> and <b>2</b> |        |              |       |
|----------------------------------------------------|--------|--------------|-------|
| Bond Lengths                                       | (Å)    | Bond Lengths | (Å)   |
| Zn1O1                                              | 2.1533 | Cd1O1        | 2.317 |
| Zn1O11                                             | 2.1533 | Cd1O11       | 2.317 |
| Zn1O71                                             | 2.1141 | Cd1O71       | 2.313 |
| Zn1O7                                              | 2.1141 | Cd1O7        | 2.313 |
| Zn1N3                                              | 2.1359 | Cd1N3        | 2.292 |
| Zn1N31                                             | 2.1359 | Cd1N31       | 2.292 |

  

| Selected bond angles (°) in <b>1</b> and <b>2</b> |           |                                    |           |
|---------------------------------------------------|-----------|------------------------------------|-----------|
| Bond Angles                                       | (°)       | Bond Angles                        | (°)       |
| O1 <sup>1</sup> Zn1O1                             | 180.0     | O1 <sup>1</sup> Cd1O1              | 180.0     |
| O7Zn1O1                                           | 91.32 (6) | O7Cd1O1                            | 90.70 (8) |
| O7 <sup>1</sup> Zn1O1                             | 88.67 (6) | O7 <sup>1</sup> Cd1O1              | 89.30 (8) |
| O7 <sup>1</sup> Zn1O1 <sup>1</sup>                | 91.33 (6) | O7 <sup>1</sup> Cd1O1 <sup>1</sup> | 90.70 (8) |
| O7Zn1O1 <sup>1</sup>                              | 88.68 (6) | O7Cd1O1 <sup>1</sup>               | 89.30 (8) |
| O7 <sup>1</sup> Zn1O7                             | 180.0     | O7 <sup>1</sup> Cd1O7              | 180.0     |
| O7 <sup>1</sup> Zn1N3 <sup>1</sup>                | 89.85 (7) | O7 <sup>1</sup> Cd1N3 <sup>1</sup> | 89.25 (9) |
| O7 <sup>1</sup> Zn1N3                             | 90.14 (7) | O7 <sup>1</sup> Cd1N3              | 90.75 (9) |
| O7Zn1N3                                           | 89.86 (7) | O7Cd1N3                            | 89.25 (9) |
| O7Zn1N3 <sup>1</sup>                              | 90.15 (7) | O7Cd1N3 <sup>1</sup>               | 90.75 (9) |
| N3Zn1O1                                           | 92.45 (6) | N3Cd1O1                            | 94.25 (9) |
| N3 <sup>1</sup> Zn1O1 <sup>1</sup>                | 92.45 (6) | N3 <sup>1</sup> Cd1O1 <sup>1</sup> | 94.25 (9) |
| N3ZnO1 <sup>1</sup>                               | 87.55 (6) | N3Cd1O1 <sup>1</sup>               | 85.75 (9) |
| N3 <sup>1</sup> Zn1O1                             | 87.55 (6) | N3 <sup>1</sup> Cd1O1              | 85.75 (9) |
| N3Zn1N3 <sup>1</sup>                              | 180.0     | N3Cd1N3 <sup>1</sup>               | 180.0     |

<sup>1</sup>1-X,1-Y,1-Z

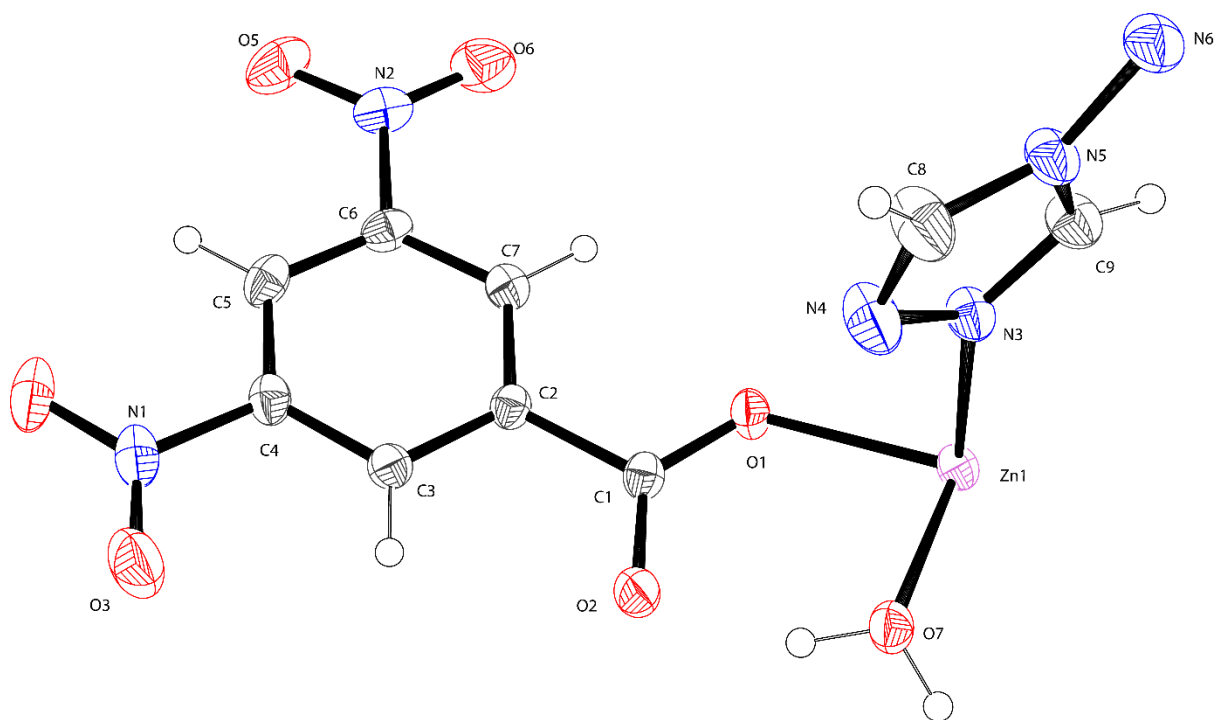

Fig. S3 ORTEP diagram of asymmetric unit of **1** with 40% ellipsoid probability.

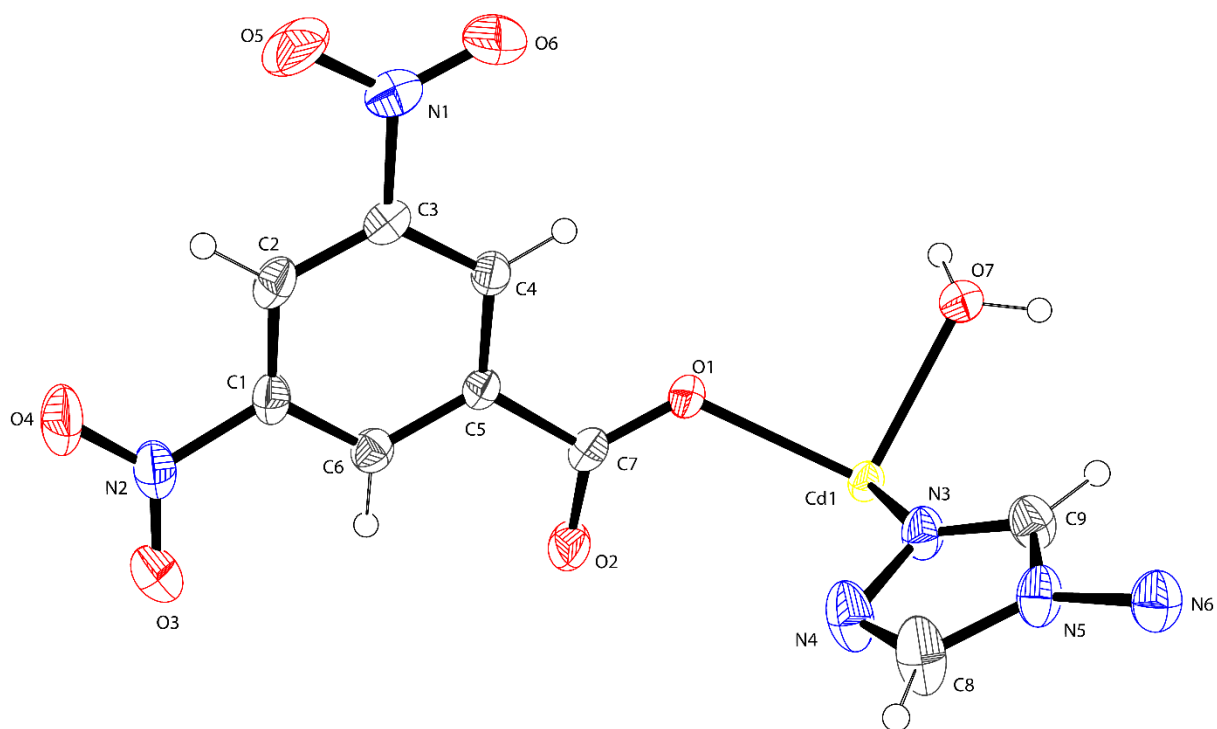

Fig. S4 ORTEP diagram of asymmetric unit of **2** with 40% ellipsoid probability.

**Table S3** Hydrogen bond lengths ( $\text{\AA}$ ) and angles ( $^\circ$ ) in **1** and **2**.

| CPs      | D-H...A     | d(D-H) | d(H...A) | d(D...A) | $\angle$ DHA |
|----------|-------------|--------|----------|----------|--------------|
| <b>1</b> | O7-H7B...O2 | 0.867  | 1.829    | 2.614    | 149.56       |
|          | O7-H7B...O1 | 0.867  | 3.049    | 2.917    | 90.41        |
| <b>2</b> | O7-H7B...O2 | 0.884  | 1.894    | 2.673    | 145.80       |
|          | O7-H7A...O1 | 0.884  | 2.060    | 2.849    | 148.23       |

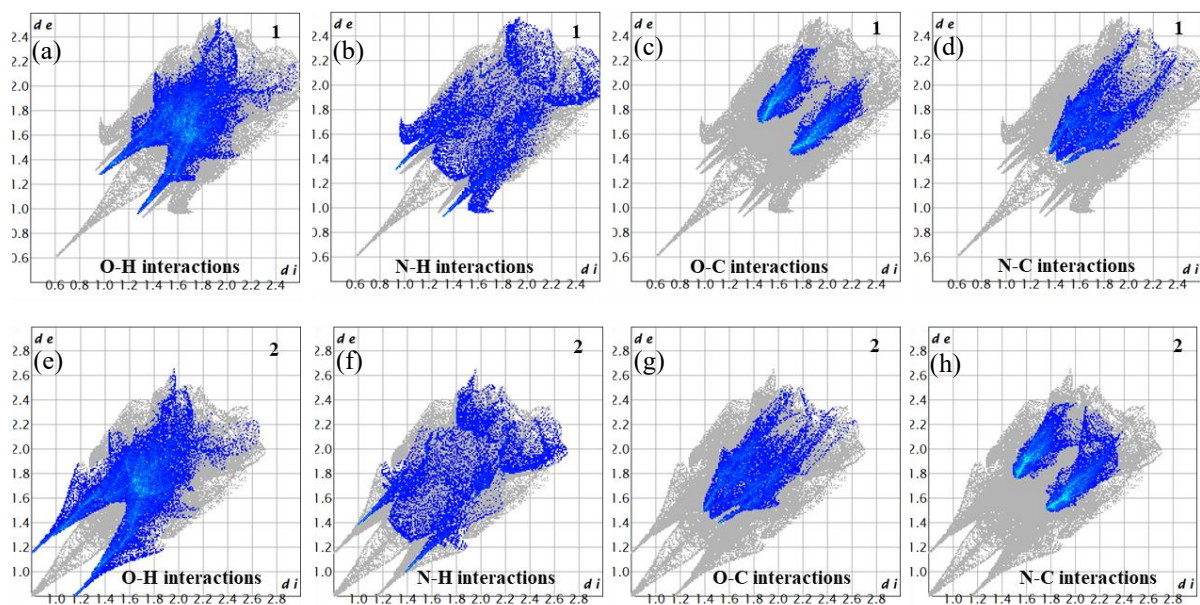

**Fig. S5** 2D Fingerplot for individual interactions (a-d) in **1** and (e-f) in **2**.



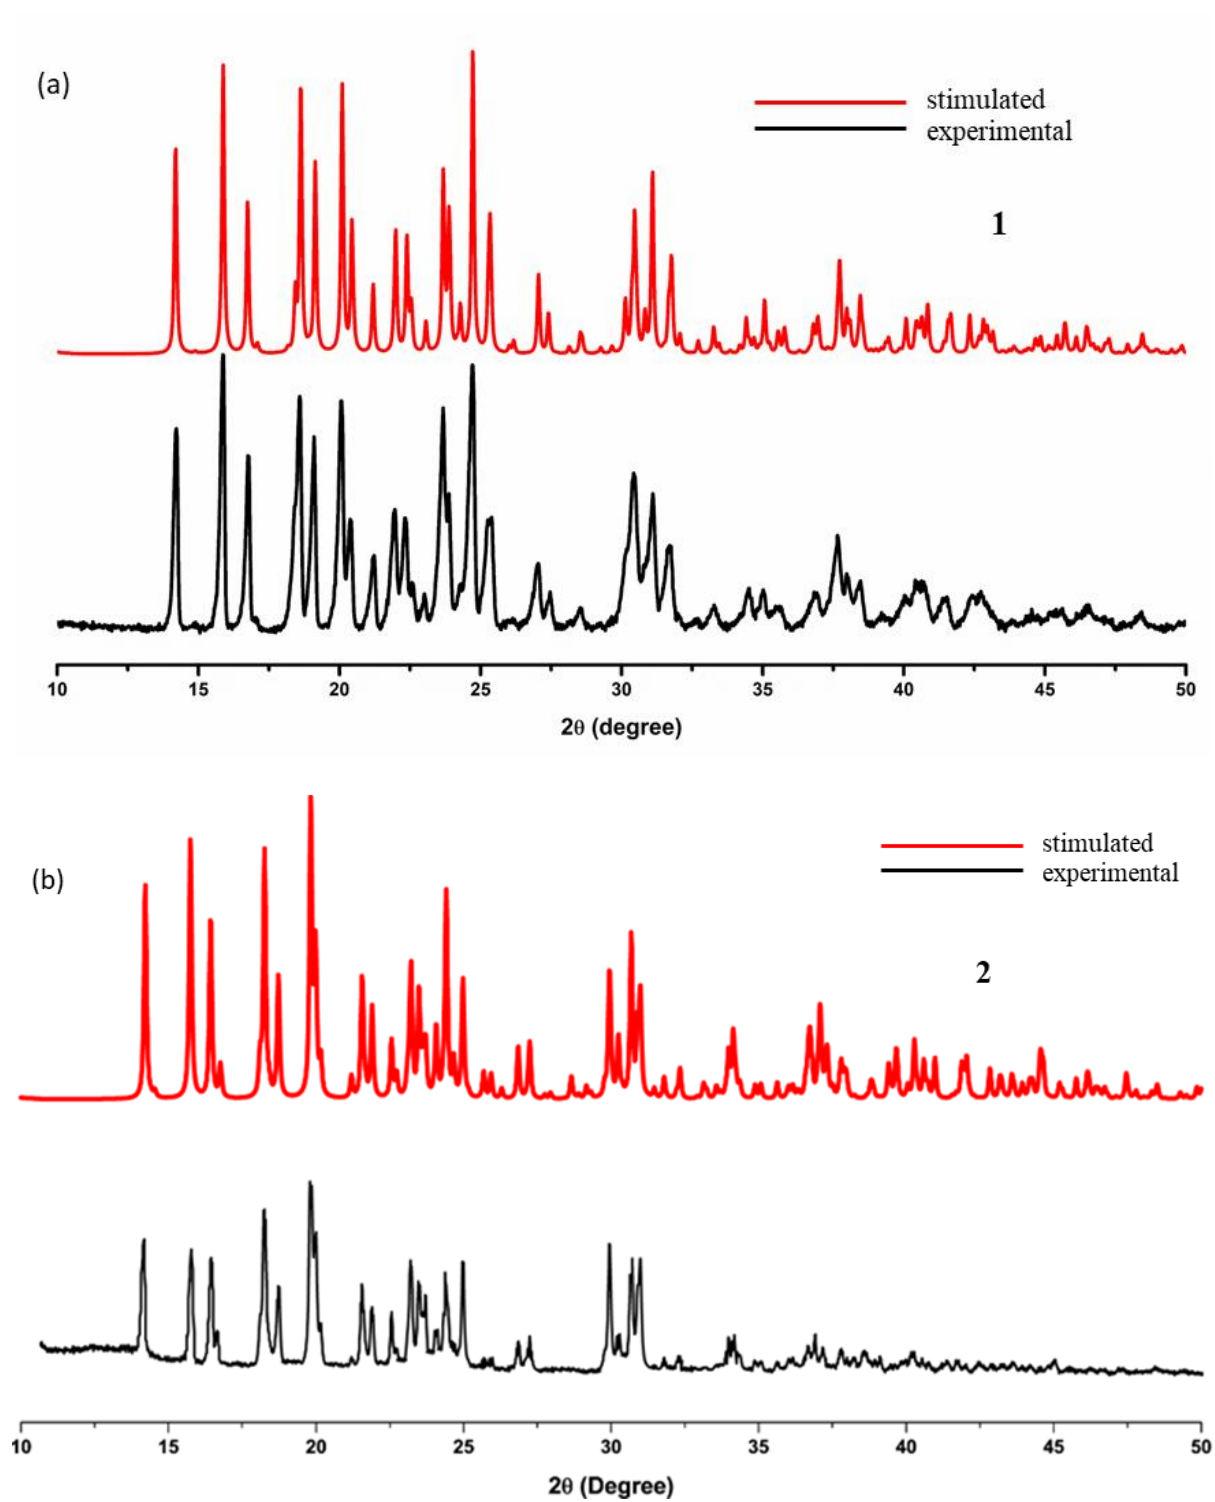

Fig. S6 PXRd patterns of (a) 1 and (b) 2.

## FT-IR study

The FT-IR spectrum of atrz, **1** and **2** is represented in figure S7. In CP **1**, the weak peaks at 3136 and 3053  $\text{cm}^{-1}$  correspond to -OH group of water molecules while strong peak at 1605  $\text{cm}^{-1}$  attributes to the presence of -C=O group. The presence of  $\text{NO}_2$  is indicated by the strong peaks at 1532 and 1504  $\text{cm}^{-1}$ . The peak at 1485  $\text{cm}^{-1}$  is due to C=N stretching vibrations. The strong peak at 1384  $\text{cm}^{-1}$  represents -CH bending vibrations while peaks at 1304 and 1183  $\text{cm}^{-1}$  represent bending vibrations of -OH group in **1**. The strong peak at 1033  $\text{cm}^{-1}$  is appeared due to the stretching vibrations of -C-O functional group in **1**. The peak at 867  $\text{cm}^{-1}$  corresponds to C=C bending vibrations while peak at 711  $\text{cm}^{-1}$  confirms the presence of bending vibrations of -CH functional group present in **1**.

The peaks at 3107 and 3083  $\text{cm}^{-1}$  confirms the presence of -OH group present in **2** whereas the characteristic peaks at 1698 and 1628  $\text{cm}^{-1}$  represent stretching vibrations of -C=O group as shown in FT-IR spectrum of **2** in figure S7. The strong peaks at 1535 and 1497  $\text{cm}^{-1}$  indicate - $\text{NO}_2$  stretching vibrations which peak at 1474  $\text{cm}^{-1}$  is appeared due to the stretching vibrations of -C=N functional group. The strong peaks at 1343 and 1287  $\text{cm}^{-1}$  correspond to the -OH bending vibrations. The presence of -C-O functional group is confirmed by characteristic peak at 1033  $\text{cm}^{-1}$ . The peak at 923  $\text{cm}^{-1}$  is appeared due to C=C bending vibrations while peak at 720  $\text{cm}^{-1}$  represents bending vibrations of -CH functional group.

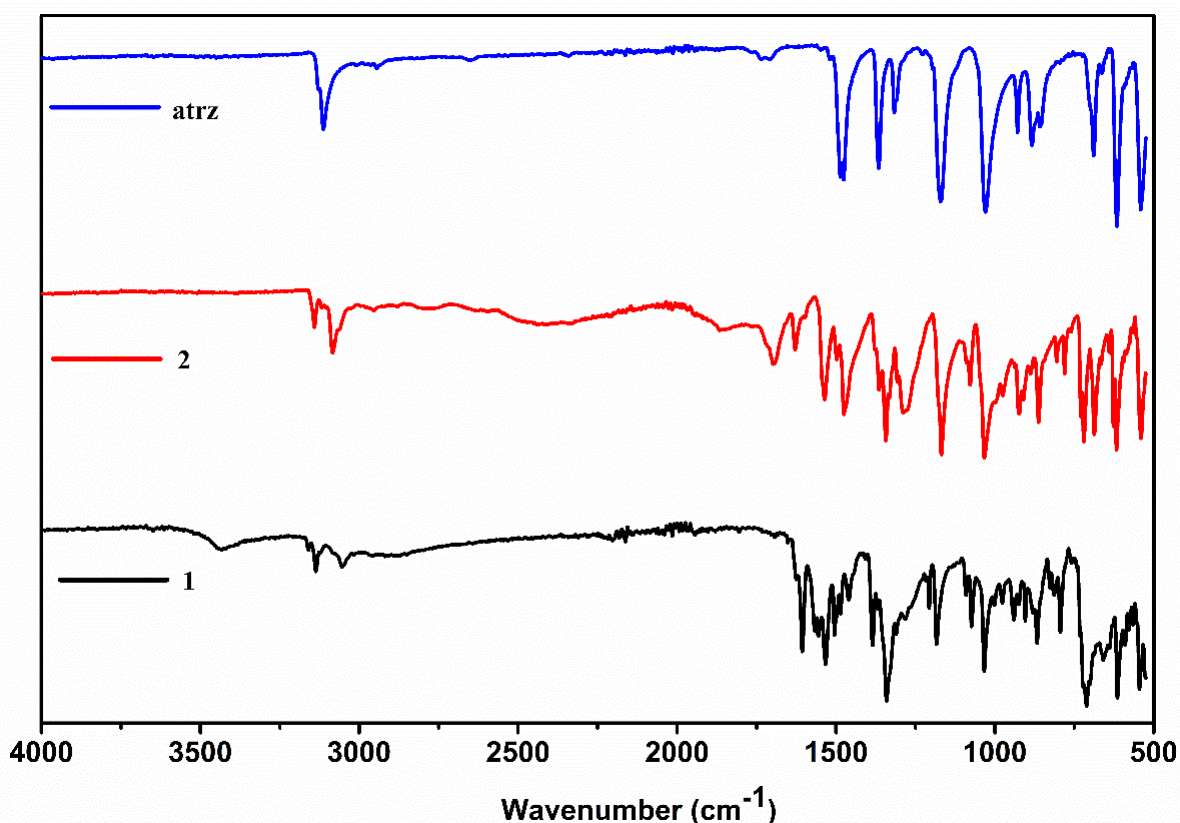

Fig. S7 FT-IR spectrum of atrz, **1** and **2**.

## UV Study

The UV-Visible spectra of both ligands (HDNBA and atrz), **1** and **2** were recorded in water solvent shown in figure S8. Due to  $\pi \rightarrow \pi^*$  transitions, the atrz exhibits sharp peak  $\lambda_{\max}$  at 248 nm while the HDNBA exhibits sharp peak  $\lambda_{\max}$  at 264 nm. CP **1** shows two distinct peaks at 205 and 248 nm due to  $\pi \rightarrow \pi^*$  transitions of atrz and HDNBA ligands respectively. While CP **2** shows two sharp peaks at 205 and 251 nm which are also due to  $\pi \rightarrow \pi^*$  transitions of atrz and HDNBA ligands respectively. Both CP **1** and **2** do not show d-d transition peak as Zn and Cd ions are in +2 oxidation state *i.e.*  $d^{10}$  configuration.

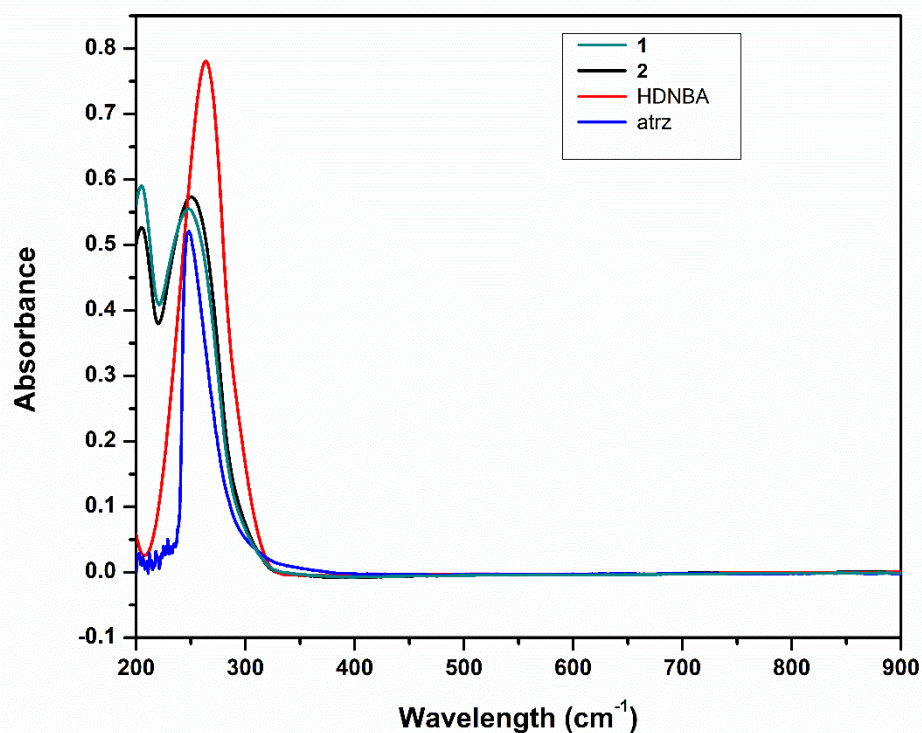

Fig. S8 UV spectrum of atrz, HDNBA, **1** and **2**.

Table S4 Thermal characteristic data of **1** and **2** obtained from DSC method.

| CPs                  | Thermal decomposition temperature (°C) |                     |                | Enthalpy J/g |
|----------------------|----------------------------------------|---------------------|----------------|--------------|
|                      | T <sub>onset</sub>                     | T <sub>endset</sub> | T <sub>p</sub> |              |
| 1 <sup>st</sup> Step |                                        |                     |                |              |
| <b>1</b>             | 129.9                                  | 146.2               | 137.2          | -154.8       |
| <b>2</b>             | 145.3                                  | 160.7               | 153.3          | -141.7       |
| 2 <sup>nd</sup> Step |                                        |                     |                |              |
| <b>1</b>             | 261.7                                  | 275.7               | 268.6          | 445.3        |
| <b>2</b>             | 262.6                                  | 278.5               | 269.4          | 452.5        |
| 3 <sup>rd</sup> step |                                        |                     |                |              |
| <b>1</b>             | 387.6                                  | 440.1               | 424.6          | 636.3        |
| <b>2</b>             | 357.1                                  | 386.7               | 365.2          | 801.9        |

**Table S5** Energetic parameters of **1** and **2**.

|          | $\Delta_c U_m^\ominus$ | $\Delta_c H_m^\ominus$ | $\Delta_f H_m^\ominus$ | N                   | M                   | Q                    | $\phi$ | P                  | D                  | P     |
|----------|------------------------|------------------------|------------------------|---------------------|---------------------|----------------------|--------|--------------------|--------------------|-------|
|          | $\text{kJ mol}^{-1}$   | $\text{kJ mol}^{-1}$   | $\text{kJ mol}^{-1}$   | $\text{mol g}^{-1}$ | $\text{g mol}^{-1}$ | $\text{kcal g}^{-1}$ |        | $\text{g cm}^{-3}$ | $\text{km s}^{-1}$ | GPa   |
| <b>1</b> | -8562.33               | -8540.02               | -894.43                | 0.0233              | 26.625              | 0.810                | 3.428  | 1.814              | 6.28               | 17.57 |
| <b>2</b> | -11000.58              | -10978.27              | 1635.93                | 0.0218              | 26.625              | 1.551                | 4.438  | 1.850              | 7.24               | 23.67 |

**Table S6** Activation energy data for **1** and **2**.

| S. No. | <b>1</b>       |                                               | <b>2</b>       |                                               |
|--------|----------------|-----------------------------------------------|----------------|-----------------------------------------------|
|        | Conversion (%) | Activation Energy<br>( $\text{kJ mol}^{-1}$ ) | Conversion (%) | Activation Energy<br>( $\text{kJ mol}^{-1}$ ) |
| 2      | 0.1            | 103.2                                         | 0.1            | 159.1                                         |
| 3      | 0.2            | 129.0                                         | 0.2            | 178.2                                         |
| 4      | 0.3            | 146.7                                         | 0.3            | 187.5                                         |
| 5      | 0.4            | 156.9                                         | 0.4            | 188.1                                         |
| 6      | 0.5            | 161.2                                         | 0.5            | 183.2                                         |
| 7      | 0.6            | 161.4                                         | 0.6            | 177.3                                         |
| 8      | 0.7            | 157.2                                         | 0.7            | 164.7                                         |
| 9      | 0.8            | 147.4                                         | 0.8            | 148.0                                         |
| 10     | 0.9            | 131.0                                         | 0.9            | 126.2                                         |
| Mean   |                | 143.8                                         |                | 168.0                                         |
